# Supplementary material
Source: publisher figshare collection journal article supplement (https://osapublishing.figshare.com/ndownloader/files/25999964)
Supplement: Supplementary file 1 [file 25999964]

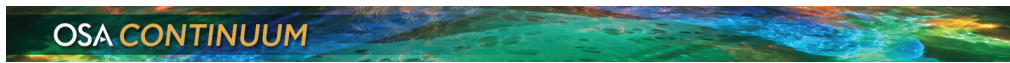

## Robustness to periodic noise in ghost imaging using random and inverse patterns: supplement

**YUTA HARUSE,\* TERUAKI TORII, SHINTARO SUGIMOTO, AND YUSUKE KASABA**

*Koito Manufacturing Co., Ltd. 500 Kitawaki, Shimizu, Shizuoka, Shizuoka 424-0052, Japan*

*\*y-haruse@koito.co.jp*

---

This supplement published with The Optical Society on 8 January 2021 by The Authors under the terms of the [Creative Commons Attribution 4.0 License](#) in the format provided by the authors and unedited. Further distribution of this work must maintain attribution to the author(s) and the published article's title, journal citation, and DOI.

Supplement DOI: <https://doi.org/10.6084/m9.figshare.13345745>

Parent Article DOI: <https://doi.org/10.1364/OSAC.414243>

## Robustness to periodic noise in ghost imaging using random and inverse patterns: supplemental document

We compare IPGI with the use of inverse pattern to Hadamard transform. We use GIWHT [1] as the reconstruction algorithm. This is a method that illuminates the inverse pattern and uses differential signals. Figure S1 shows reconstructed images using  $32 \times 32$  patterns in simulation. The noise is 100 patterns / noise period and  $SD = 10,000$ . When the number of patterns is 2,048, both GIWHT and IPGI have not been able to reconstruct the images. However, by increasing the number of patterns to 20,480, the quality of the IPGI image has been improved. The number of patterns is limited to 2,048 ( $= 2 \times 32^2$ ) in Hadamard transform, so it cannot be done like IPGI. This suggests that for low signal-to-noise ratios, IPGI is more robust than Hadamard transform using inverse pattern.

|                        | GIWHT<br>(2,048 patt.)                                                             | IPGI<br>(2,048 patt.)                                                              | IPGI<br>(20,480 patt.)                                                               |
|------------------------|------------------------------------------------------------------------------------|------------------------------------------------------------------------------------|--------------------------------------------------------------------------------------|
| Reconstructed<br>image |  |  |  |
| MSE                    | 0.259                                                                              | 0.256                                                                              | 0.101                                                                                |

Fig. S1. Reconstructed images of GIWHT, IPGI and MSE (100 patterns / noise period,  $SD = 10,000$ ).

### References

1. L. Wang, S. Zhao, "Fast reconstructed and high-quality ghost imaging with fast Walsh–Hadamard transform," *Photon. Res.* 4(6), 240-244 (2016).
